# Supplementary material
Source: PubMed Central journal article supplement (PMC2754682)

Supplementary Figure 1

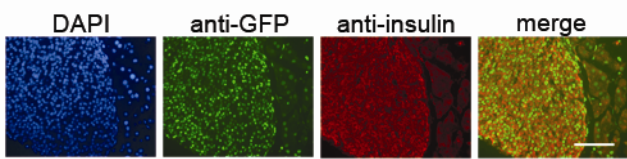

Supplement: en.2009-0287_1.pdf [file en.2009-0287_1.pdf]

Supplementary Figure 2

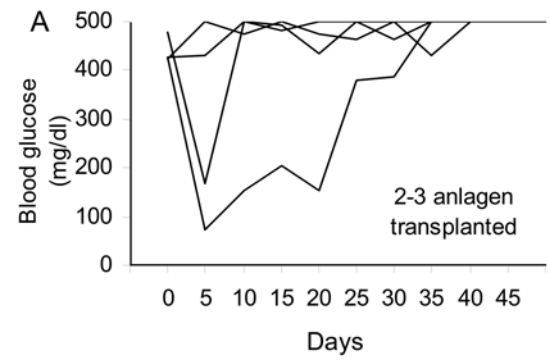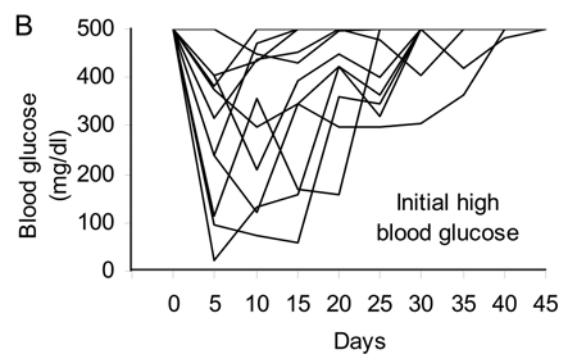

Supplement: en.2009-0287_2.pdf [file en.2009-0287_2.pdf]

### Supplementary Figure 3

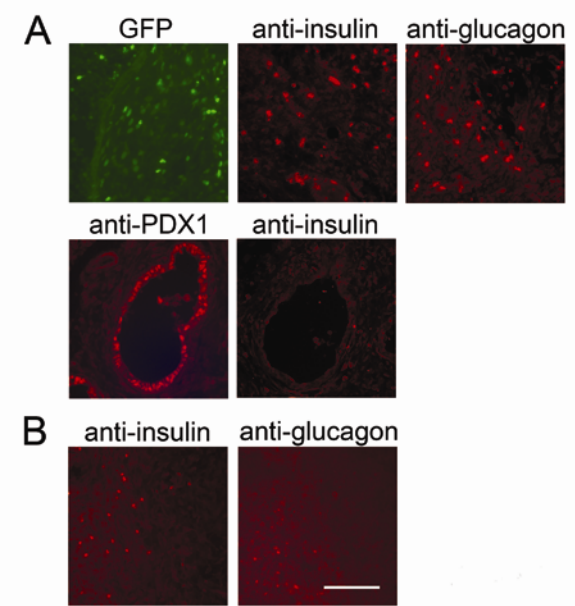

Supplement: en.2009-0287_3.pdf [file en.2009-0287_3.pdf]

Supplementary Figure 4

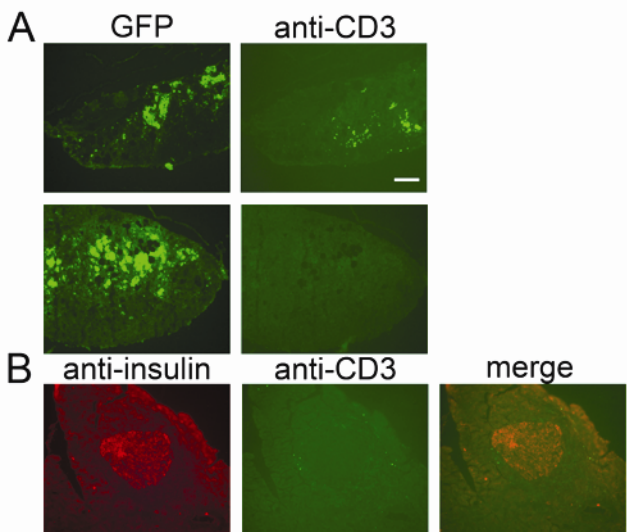

Supplement: en.2009-0287_4.pdf [file en.2009-0287_4.pdf]
